# Supplementary material for: The Big Three Health Behaviors and Mental Health and Well-Being Among Young Adults: A Cross-Sectional Investigation of Sleep, Exercise, and Diet
Source: PubMed Central journal article supplement (PMC7758199; doi:10.3389/fpsyg.2020.579205), 2020-12-10
Supplement: Data_Sheet_1.pdf [file Data_Sheet_1.pdf]

## *Supplementary Material*

### Supplementary Table 1

*Bivariate Correlations among Health Behaviors (N=1111)*

|                   | Sleep Quality | Physical Activity | Raw FV   | Processed FV | Fast Food | Sweets   | Soda      |
|-------------------|---------------|-------------------|----------|--------------|-----------|----------|-----------|
| Sleep Quantity    | 0.245***      | -0.015            | 0.009    | -0.002       | -0.016    | -0.033   | -0.028    |
| Sleep Quality     | -             | 0.159***          | 0.142*** | 0.012        | -0.096**  | -0.097** | -0.053    |
| Physical Activity |               | -                 | 0.374*** | 0.192***     | -0.081**  | 0.009    | -0.151*** |
| Raw FV            |               |                   | -        | 0.339***     | -0.092**  | 0.030    | -0.127*** |
| Processed FV      |               |                   |          | -            | 0.033     | 0.156*** | -0.027    |
| Fast Food         |               |                   |          |              | -         | 0.286*** | 0.248***  |
| Sweets            |               |                   |          |              |           | -        | 0.105***  |

*Note.* \*\* $p < .01$ , \*\*\* $p < .001$ ; FV = Fruit and Vegetable consumption; Sweets = Chocolate and Candy combined

### Supplementary Table 2

*Bivariate Correlations between Health Behaviors and Depressive Symptoms / Flourishing (n = 1111)*

|                   | Depressive Symptoms | Flourishing |
|-------------------|---------------------|-------------|
| Sleep Quantity    | -0.178***           | 0.100**     |
| Sleep Quality     | -0.475***           | 0.415***    |
| Physical Activity | -0.198***           | 0.279***    |
| Raw FV            | -0.136***           | 0.212***    |
| Processed FV      | 0.019               | 0.038       |
| Fast Food         | 0.136***            | -0.161***   |
| Sweets            | 0.118***            | -0.046      |
| Soda              | 0.111***            | -0.140***   |

*Note.* \*\*\* $p < .001$ ; Correlations are not adjusted for any covariates. FV = Fruit and Vegetable consumption; Sweets = Chocolate and Candy combined.

### Supplementary Table 3

*Bivariate Correlations between Covariates and Health Behaviors (n = 1111)*

| Covariate                       | Sleep Quantity | Sleep Quality | Physical Activity | Raw FV    | Processed FV | Fast Food | Sweets    | Soda      |
|---------------------------------|----------------|---------------|-------------------|-----------|--------------|-----------|-----------|-----------|
| Age                             | -0.046         | 0.039         | -0.100**          | -0.137*** | -0.072*      | 0.070*    | -0.055    | 0.129***  |
| Gender <sup>1</sup>             | -0.093**       | -0.168***     | -0.057            | 0.066*    | 0.054        | -0.119*** | 0.070*    | -0.093**  |
| Ethnicity <sup>2</sup>          | -0.067*        | 0.021         | -0.040            | -0.053    | 0.009        | 0.120***  | 0.025     | -0.060*   |
| Sample <sup>3</sup>             | -0.043         | 0.056         | -0.163***         | -0.180*** | -0.142***    | 0.102**   | -0.110*** | 0.186***  |
| Unemployment <sup>4</sup>       | 0.020          | -0.073*       | -0.096**          | -0.096**  | -0.026       | -0.004    | 0.018     | 0.052     |
| SES                             | 0.136***       | 0.303***      | 0.189***          | 0.189***  | 0.071*       | -0.144*** | -0.038    | -0.120*** |
| BMI                             | -0.097**       | -0.132***     | -0.180***         | -0.111*** | -0.103**     | 0.163***  | -0.038    | 0.203***  |
| Health Condition <sup>5</sup>   | -0.024         | -0.199***     | -0.036            | 0.013     | 0.032        | 0.045     | 0.072*    | 0.095**   |
| Antidepressant use <sup>6</sup> | 0.026          | -0.111***     | -0.114***         | -0.066*   | -0.003       | 0.023     | -0.026    | 0.109***  |
| Supplement use <sup>7</sup>     | 0.002          | 0.015         | 0.047             | 0.149***  | 0.051        | -0.014    | 0.041     | -0.067*   |
| Food Allergy <sup>8</sup>       | -0.015         | -0.054        | 0.025             | 0.080**   | 0.073*       | 0.102**   | 0.093**   | 0.011     |
| Vegetarian <sup>9</sup>         | -0.004         | -0.048        | 0.016             | 0.151***  | 0.115***     | -0.086**  | 0.009     | -0.055    |
| Alcohol                         | 0.021          | -0.074*       | 0.035             | 0.051     | 0.050        | 0.115***  | 0.065*    | -0.009    |
| Smoking <sup>10</sup>           | -0.004         | -0.037        | -0.062*           | -0.010    | 0.063*       | 0.147***  | 0.083**   | 0.150**   |

Note. \* $p < .05$ , \*\* $p < .01$ , \*\*\* $p < .001$ . SES = socioeconomic status; BMI = body mass index

<sup>1</sup> male (0) vs. female/gender diverse (1); <sup>2</sup> white (0) vs. non-white /mixed ethnicity (1); <sup>3</sup> psychology (0) vs. MTurk (1); <sup>4</sup> not unemployed (0) vs. unemployed (1); <sup>5</sup> none (0) vs. any current medical condition (1); <sup>6</sup> not currently taking (0) vs. currently taking antidepressant/mood stabilizing medication (1); <sup>7</sup> not currently taking (0) vs. currently taking vitamin supplements (1); <sup>8</sup> no food allergy (0) vs. food allergy (1); <sup>9</sup> non-vegetarian (0) vs. vegetarian/vegan (1); <sup>10</sup> non-smoker (0) vs. smoker (1).

## Supplementary Table 4

*Hierarchical Regression Model 1 using only the Covariates to Predict Depressive Symptoms and Flourishing*

(*n* = 1111).

| Model 1- only covariates      | Depressive Symptoms<br>B, b (SE) | Flourishing<br>B, b (SE)   |
|-------------------------------|----------------------------------|----------------------------|
| <i>Intercept</i>              | -n/a, 13.891 (1.216) ***         | -n/a, 5.306 (0.115) ***    |
| <i>Covariates</i>             |                                  |                            |
| Age                           | -0.126, -0.699 (0.214) **        | 0.093, 0.048 (0.020) *     |
| Gender - Female               | 0.080, 2.263 (0.798) **          | 0.039, 0.102 (0.075)       |
| Gender - Diverse              | 0.054, 5.410 (2.759) *           | 0.003, 0.029 (0.261)       |
| Ethnicity - Asian             | 0.049, 2.351 (1.313)             | -0.089, -0.397 (0.124) **  |
| Ethnicity - Black             | -0.009, -0.497 (1.565)           | 0.062, 0.332 (0.148) *     |
| Ethnicity - Hispanic          | 0.060, 3.975 (1.774) *           | -0.045, -0.277 (0.168)     |
| Ethnicity - Mixed/ Other      | 0.034, 1.162 (0.926)             | -0.015, -0.048 (0.087)     |
| Sample                        | 0.014, 0.406 (1.175)             | -0.107, -0.283 (0.111) *   |
| Unemployment                  | 0.053, 2.381 (1.210)*            | -0.095, -0.394 (0.114) **  |
| SES                           | -0.340, -3.388 (0.279) ***       | 0.378, 0.349 (0.026) ***   |
| BMI                           | 0.086, 0.182 (0.058) **          | -0.067, -0.013 (0.005) *   |
| Health Condition              | 0.190, 5.403 (0.792) ***         | -0.085, -0.222 (0.075) **  |
| Antidepressant use            | 0.135, 4.393 (0.893) ***         | -0.100, -0.301 (0.084) *** |
| Supplement use                | -0.005, -0.075 (0.427)           | 0.022, 0.032 (0.040)       |
| Food Allergy                  | 0.037, 1.301 (0.948)             | 0.017, 0.056 (0.090)       |
| Vegetarian                    | 0.019, 0.969 (1.376)             | -0.008, -0.039 (0.130)     |
| Alcohol                       | 0.030, 0.323 (0.305)             | -0.025, -0.025 (0.029)     |
| Smoking                       | 0.038, 1.758 (1.244)             | 0.012, 0.050 (0.118)       |
| <i>R</i> <sup>2</sup>         | 0.265***                         | 0.234***                   |
| <i>F</i> change ( <i>df</i> ) | 21.901 (18,1092)                 | 18.578 (18,1092)           |

*Note.* B = standardized regression coefficient, b= unstandardized regression coefficient; BMI = body mass index; FV = fruits and vegetables; SE = standard error; SES = socioeconomic status; continuous measures were all centered. \**p* < .05; \*\**p* < .01; \*\*\**p* < .001

## Supplementary Table 5

*Hierarchical Regression Model 3 testing for Interactions among Health Behaviors to Predict Depressive Symptoms and Flourishing (n = 1111).*

| Model 3- adding interactions           | Depressive Symptoms<br>B, b (SE) | Flourishing<br>B, b (SE)  |
|----------------------------------------|----------------------------------|---------------------------|
| <i>Intercept</i>                       | n/a, 4.379 (4.331)               | n/a, 4.663 (0.338) ***    |
| <i>Covariates</i>                      |                                  |                           |
| Age                                    | -0.112, -0.621 (0.199) **        | 0.073, 0.038 (0.019) *    |
| Gender - Female                        | 0.042, 1.187 (0.755)             | 0.071, 0.187 (0.071) **   |
| Gender - Diverse                       | 0.036, 3.653 (2.577)             | 0.029, 0.269 (0.242)      |
| Ethnicity - Asian                      | 0.037, 1.781 (1.231)             | -0.067, -0.301 (0.116) ** |
| Ethnicity - Black                      | 0.009, 0.534 (1.455)             | 0.044, 0.232 (0.137)      |
| Ethnicity - Hispanic                   | 0.054, 3.618 (1.644) *           | -0.042, -0.260 (0.155)    |
| Ethnicity - Mixed/ Other               | 0.022, 0.764 (0.868)             | -0.008, -0.026 (0.082)    |
| Sample                                 | 0.022, 0.621 (1.114)             | -0.088, -0.233 (0.105) *  |
| Unemployment                           | 0.034, 1.525 (1.124)             | -0.070, -0.290 (0.106) ** |
| SES                                    | -0.225, -2.238 (0.271) ***       | 0.264, 0.244 (0.026) *    |
| BMI                                    | 0.036, 0.076 (0.055)             | -0.003, -0.001 (0.005)    |
| Health Condition                       | 0.140, 3.983 (0.742) ***         | -0.037, -0.096 (0.070)    |
| Antidepressant use                     | 0.111, 3.606 (0.834) ***         | -0.063, -0.189 (0.078) *  |
| Supplement use                         | 0.003, 0.056 (0.400)             | 0.004, 0.006 (0.038)      |
| Food Allergy                           | 0.029, 1.009 (0.886)             | 0.018, 0.057 (0.083)      |
| Vegetarian                             | 0.015, 0.760 (1.287)             | -0.009, -0.041 (0.121)    |
| Alcohol                                | 0.002, 0.025 (0.286)             | 0.008, 0.008 (0.027)      |
| Smoking                                | 0.012, 0.542 (1.177)             | 0.042, 0.180 (0.111)      |
| <i>Health Behaviors</i>                |                                  |                           |
| Sleep Quantity                         | -0.424, -4.055 (1.043) ***       | -0.060, -0.053 (0.046)    |
| Sleep Quantity Quadratic               | 0.395, 0.229 (0.065) ***         | -0.087, -0.017 (0.006) ** |
| Sleep Quality                          | -0.348, -4.502 (1.718) **        | 0.254, 0.304 (0.162)      |
| Physical Activity                      | -0.075, -0.503 (0.181) **        | 0.143, 0.088 (0.017) ***  |
| Raw FV                                 | 0.121, 0.895 (1.065)             | -0.226, -0.155 (0.101)    |
| Raw FV Quadratic                       | -                                | -0.056, -0.008 (0.006)    |
| Processed FV                           | 0.045, 0.562 (0.330)             | -0.046, -0.054 (0.031)    |
| Fast Food                              | 0.019, 0.646 (0.919)             | -0.048, -0.149 (0.086)    |
| Sweets                                 | 0.045, 0.623 (0.360)             | 0.001, 0.001 (0.034)      |
| Soda                                   | 0.008, 0.108 (0.340)             | -0.021, -0.025 (0.032)    |
| <i>Interactions</i>                    |                                  |                           |
| Sleep Quantity X Sleep Quality         | 0.060, 0.095 (0.227)             | 0.042, 0.006 (0.021)      |
| Sleep Quantity X Activity              | -0.018, -0.077 (0.133)           | -0.010, -0.004 (0.013)    |
| Sleep Quantity X Raw FV                | -0.196, -0.190 (0.147)           | 0.374, 0.034 (0.014) *    |
| Sleep Quality X Activity               | 0.018, 0.115 (0.170)             | -0.046, -0.027 (0.016)    |
| Sleep Quality X Raw FV                 | -0.010, -0.071 (0.192)           | -0.023, -0.015 (0.018)    |
| Raw FV X Activity                      | 0.057, 0.186 (0.093) *           | -0.065, -0.020 (0.010) *  |
| R <sup>2</sup> change for Interactions | 0.004                            | 0.010**                   |
| F change (df) for Interactions         | 1.278 (6,1077)                   | 2.923 (6,1076)            |
| <i>Cross validated R<sup>2</sup></i>   | 0.342 (0.070)                    | 0.308 (0.066)             |
| <i>Overall R<sup>2</sup></i>           | 0.384                            | 0.364                     |

*Note.* b= unstandardized regression coefficient; BMI = body mass index; FV = fruits and vegetables; SE = standard error; SES = socioeconomic status; continuous measures were all centered. \* $p < .05$ ; \*\* $p < .01$ ; \*\*\* $p < .001$

# Supplementary code

Adam Bartonicek

30/06/2020

```
library(tidyverse)
library(haven)
library(labelled)
library(janitor)
library(broom)
library(caret)
library(cowplot)

theme_set(theme_bw() + theme(panel.grid.major = element_blank(),
                             panel.grid.minor = element_blank()))
```

## Data pre-processing

I first read in the data & changed all variable to lowercase to make working with them easier. After that, I selected participants who passed the inclusion checks, selected the relevant variables, changed some variables to factors (R's categorical variables), and recoded the ethnicity category into six levels (Asian, Black, Hispanic, White, and Other).

```
data_shay <- read_sav('2018-2019_Lifestyle_of_Young_Adults_Survey.sav')

data_shay_pre1 <- data_shay %>%
  clean_names()

data_shay_pre2 <- data_shay_pre1 %>%
  filter(included == 1) %>%
  select(age_c, gender, ethnicity_cat, sample, unemployed,
         ses_c, bmi_c, condition, allergy, vegetarian,
         alcohol_daily_c, medmood, vitsup, regsmoke,
         sleep_quantity_c = sleeeep_quantity_c, sleep_quality_c = sleeeep_quality_c,
         raw_fv_c, activity_c,
         cooked_fv_c, fastfood_daily_c, sweets_daily_c,
         soda_daily_c, flourishing_c, cesd_c) %>%
  mutate_at(vars(gender, ethnicity_cat, unemployed, condition, allergy,
                 vegetarian, medmood), ~ to_factor(.x)) %>%
  mutate_at(vars(sample, regsmoke), ~ factor(.x)) %>%
  mutate(ethnicity_cat = fct_other(ethnicity_cat,
                                   keep = c('Asian', 'Black', 'Hispanic', 'White'))
         %>% relevel(., ref = 'White'))
```

```

set.seed(123)

seeds <- vector(mode = "list", length = 101)
for(i in 1:101) seeds[[i]]<- sample.int(n=1000)

hlthbehaviors <- c('sleep_quantity_c', 'sleep_quality_c', 'raw_fv_c', 'activity_c')

control <- trainControl(method = 'repeatedcv', number = 10, repeats = 10, seeds = seeds)

pred_combns <- tibble(x1 = hlthbehaviors, x2 = hlthbehaviors) %>%
  expand(x1, x2) %>%
  filter(x1 != x2) %>%
  rowwise() %>%
  mutate(id = paste0(sort(c(x1, x2)), collapse = " ")) %>%
  distinct(id, .keep_all = TRUE) %>%
  select(-id)

ints <- c('+ I(sleep_quantity_c ^ 2) + I(raw_fv_c ^ 2)', paste0('+ I(sleep_quantity_c ^ 2) + I(raw_fv_c
labels <- c('Baseline (health habits + quad)', 'Int. Activity vs Raw FV', 'Int. Activity vs Sleep qual.
  'Int. Activity vs Sleep quant.', 'Int. Raw FV vs Sleep qual.', 'Int. Raw FV vs Sleep quant.',
  'Int. Sleep qual. vs Sleep quant.')

flourishing_ints <- map(ints, ~ train(
  as.formula(paste0('flourishing_c ~ . - cesd_c', paste0(.x))),
  method = 'lm',
  data = data_shay_pre2,
  trControl = control
))

cesd_ints <- map(ints, ~ train(
  as.formula(paste0('cesd_c ~ . - flourishing_c', paste0(.x))),
  method = 'lm',
  data = data_shay_pre2,
  trControl = control
))

flourishing_results_df <- map(flourishing_ints, ~ pluck(.x, 'resample')) %>%
  bind_rows() %>%
  mutate(model = rep(labels, each = 100))

cesd_results_df <- map(cesd_ints, ~ pluck(.x, 'resample')) %>%
  bind_rows() %>%
  mutate(model = rep(labels, each = 100))

ggplot(flourishing_results_df, aes(model, Rsquared)) +
  geom_jitter(height = 0, width = 0.1, size = 1, col = 'grey40') +
  geom_boxplot(alpha = 0.75, fill = 'grey80', col = 'grey40', outlier.color = NA) +
  scale_x_discrete(guide = guide_axis(n.dodge = 2)) +
  labs(x = 'Model', y = 'Cross-validated R2 - Flourishing')

```

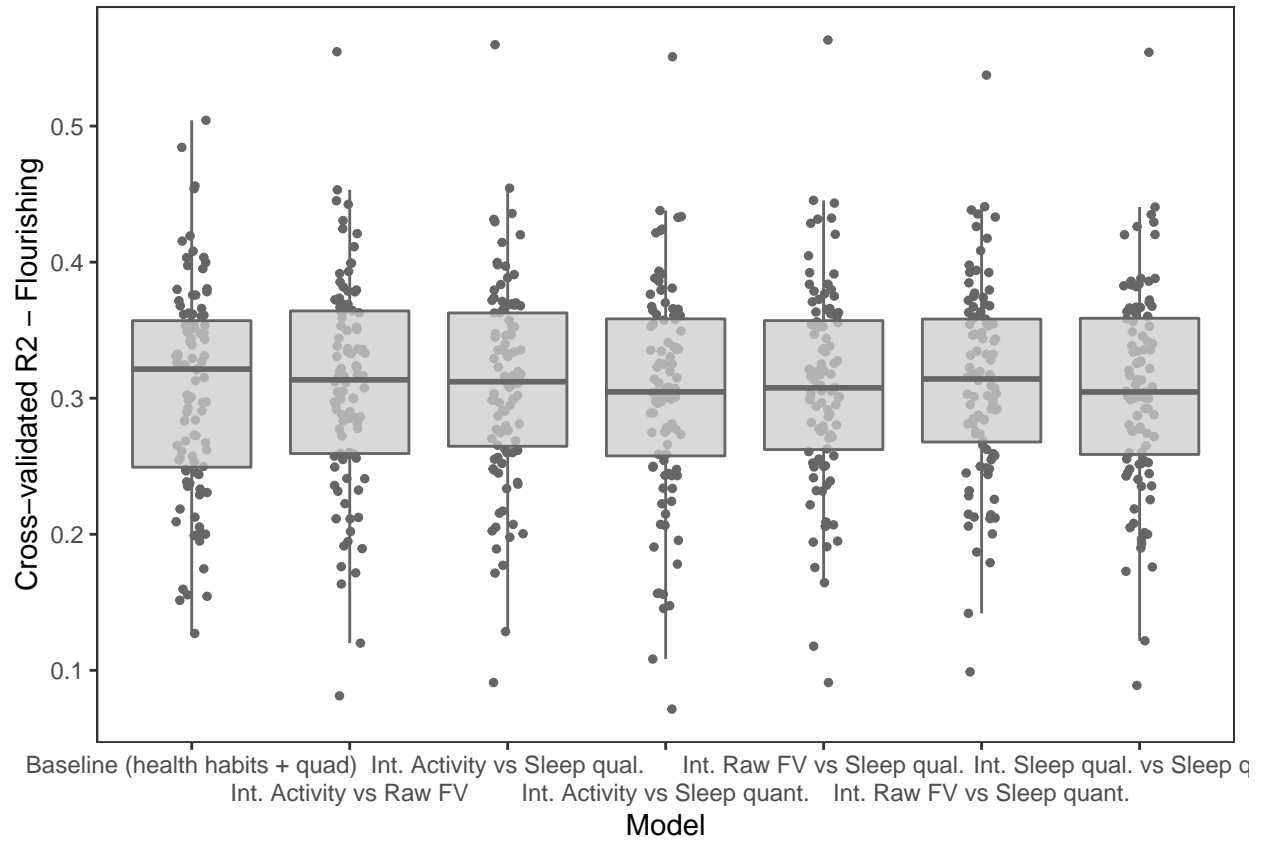

```
ggplot(cesd_results_df, aes(model, Rsquared)) +
  geom_jitter(height = 0, width = 0.1, size = 1, col = 'grey40') +
  geom_boxplot(alpha = 0.75, fill = 'grey80', col = 'grey40', outlier.color = NA) +
  scale_x_discrete(guide = guide_axis(n.dodge = 2)) +
  labs(x = 'Model', y = 'Cross-validated R2 - Depressive Symptoms')
```

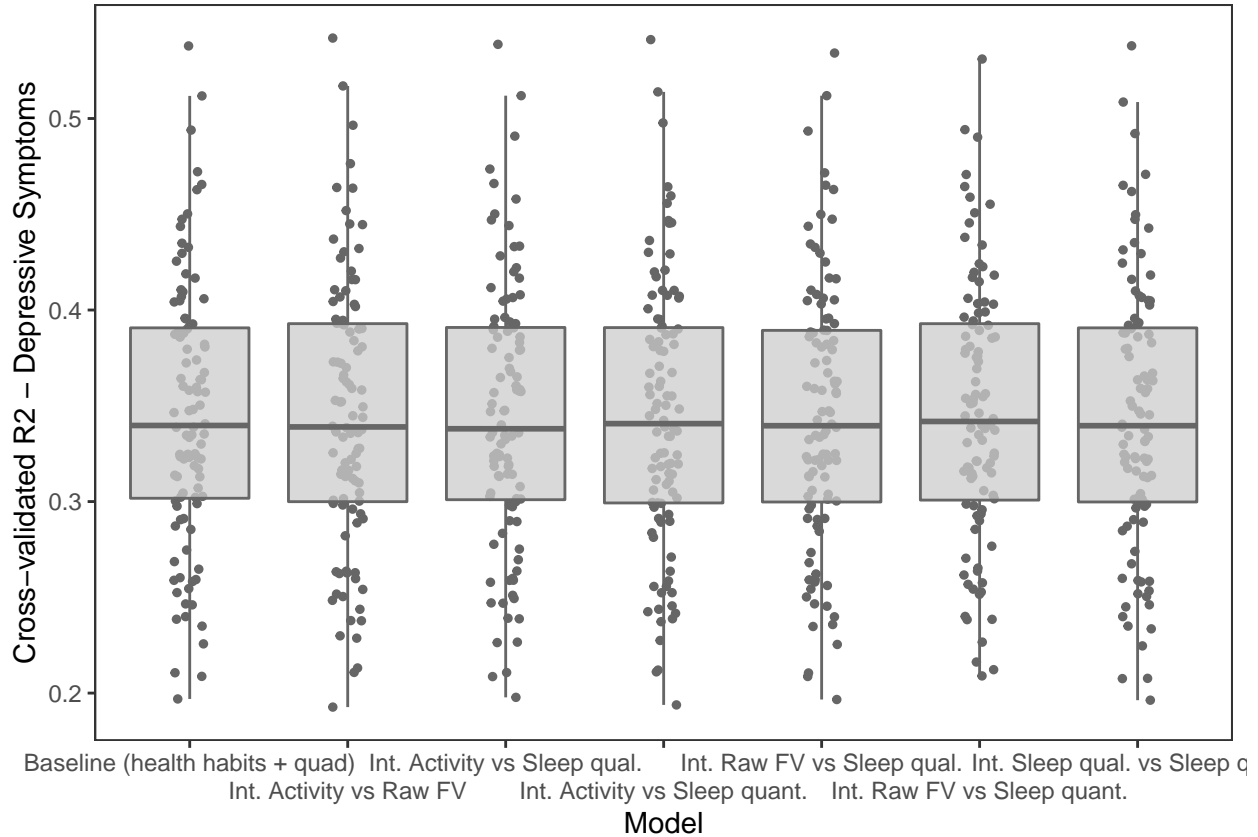

```
flourishing_results_df %>%
  group_by(model) %>%
  summarize(RMSE_mean = mean(RMSE),
            RMSE_sd = sd(RMSE),
            R2_mean = mean(Rsquared),
            R2_sd = sd(Rsquared)) %>%
  select(Model = model, `Mean RMSE` = RMSE_mean,
         `RMSE std. dev` = RMSE_sd, `Mean R2` = R2_mean,
         `R2 std. dev` = R2_sd) %>%
  knitr::kable(caption = 'Cross-validated performance across models predicting Flourishing')
```

Table 1: Cross-validated performance across models predicting Flourishing

| Model                            | Mean RMSE | RMSE std. dev | Mean R2   | R2 std. dev |
|----------------------------------|-----------|---------------|-----------|-------------|
| Baseline (health habits + quad)  | 1.009670  | 0.0843666     | 0.3066713 | 0.0771294   |
| Int. Activity vs Raw FV          | 1.009060  | 0.0882026     | 0.3099076 | 0.0759209   |
| Int. Activity vs Sleep qual.     | 1.007366  | 0.0828656     | 0.3105251 | 0.0728124   |
| Int. Activity vs Sleep quant.    | 1.017013  | 0.0973331     | 0.3028950 | 0.0779807   |
| Int. Raw FV vs Sleep qual.       | 1.009393  | 0.0842756     | 0.3082801 | 0.0735747   |
| Int. Raw FV vs Sleep quant.      | 1.005565  | 0.0786686     | 0.3112747 | 0.0703279   |
| Int. Sleep qual. vs Sleep quant. | 1.010694  | 0.0842497     | 0.3064232 | 0.0728548   |



```

cesd_results_df %>%
  group_by(model) %>%
  summarize(RMSE_mean = mean(RMSE),
            RMSE_sd = sd(RMSE),
            R2_mean = mean(Rsquared),
            R2_sd = sd(Rsquared)) %>%
  select(Model = model, `Mean RMSE` = RMSE_mean,
         `RMSE std. dev` = RMSE_sd, `Mean R2` = R2_mean,
         `R2 std. dev` = R2_sd) %>%
  knitr::kable(caption = 'Cross-validated performance across models predicting Depressive Symptoms')

```

Table 2: Cross-validated performance across models predicting Depressive Symptoms

| Model                            | Mean RMSE | RMSE std. dev | Mean R2   | R2 std. dev |
|----------------------------------|-----------|---------------|-----------|-------------|
| Baseline (health habits + quad)  | 10.57248  | 0.6288402     | 0.3454029 | 0.0697365   |
| Int. Activity vs Raw FV          | 10.57713  | 0.6426332     | 0.3453489 | 0.0707459   |
| Int. Activity vs Sleep qual.     | 10.58015  | 0.6291307     | 0.3445655 | 0.0698412   |
| Int. Activity vs Sleep quant.    | 10.57985  | 0.6269172     | 0.3444854 | 0.0700546   |
| Int. Raw FV vs Sleep qual.       | 10.58059  | 0.6301751     | 0.3445076 | 0.0698309   |
| Int. Raw FV vs Sleep quant.      | 10.55389  | 0.6027675     | 0.3466046 | 0.0680471   |
| Int. Sleep qual. vs Sleep quant. | 10.58501  | 0.6320858     | 0.3441208 | 0.0699256   |

```

flourishing_formula <- paste0('flourishing_c ~ . - cesd_c + I(sleep_quantity_c ^ 2) + I(raw_fv_c ^ 2) +
  paste(hlthbehaviors, collapse = ' + '), ') ^ 2')

cesd_formula <- paste0('cesd_c ~ . - flourishing_c + I(sleep_quantity_c ^ 2) + I(raw_fv_c ^ 2) + (',
  paste(hlthbehaviors, collapse = ' + '), ') ^ 2')

flourishing_train_all <- train(
  as.formula(flourishing_formula),
  method = 'lm',
  data = data_shay_pre2,
  trControl = control
)

cesd_train_all <- train(
  as.formula(cesd_formula),
  method = 'lm',
  data = data_shay_pre2,
  trControl = control
)

flourishing_train_all$resample %>%
  ggplot(aes(x = 'Model with all quadratic terms & interactions', y = Rsquared)) +
  geom_jitter(height = 0, width = 0.1, size = 1, col = 'grey40') +
  geom_boxplot(alpha = 0.75, fill = 'grey80', col = 'grey40', outlier.color = NA) +
  scale_x_discrete(guide = guide_axis(n.dodge = 2)) +
  labs(x = '', y = 'Cross-validated R2 - Flourishing')

```

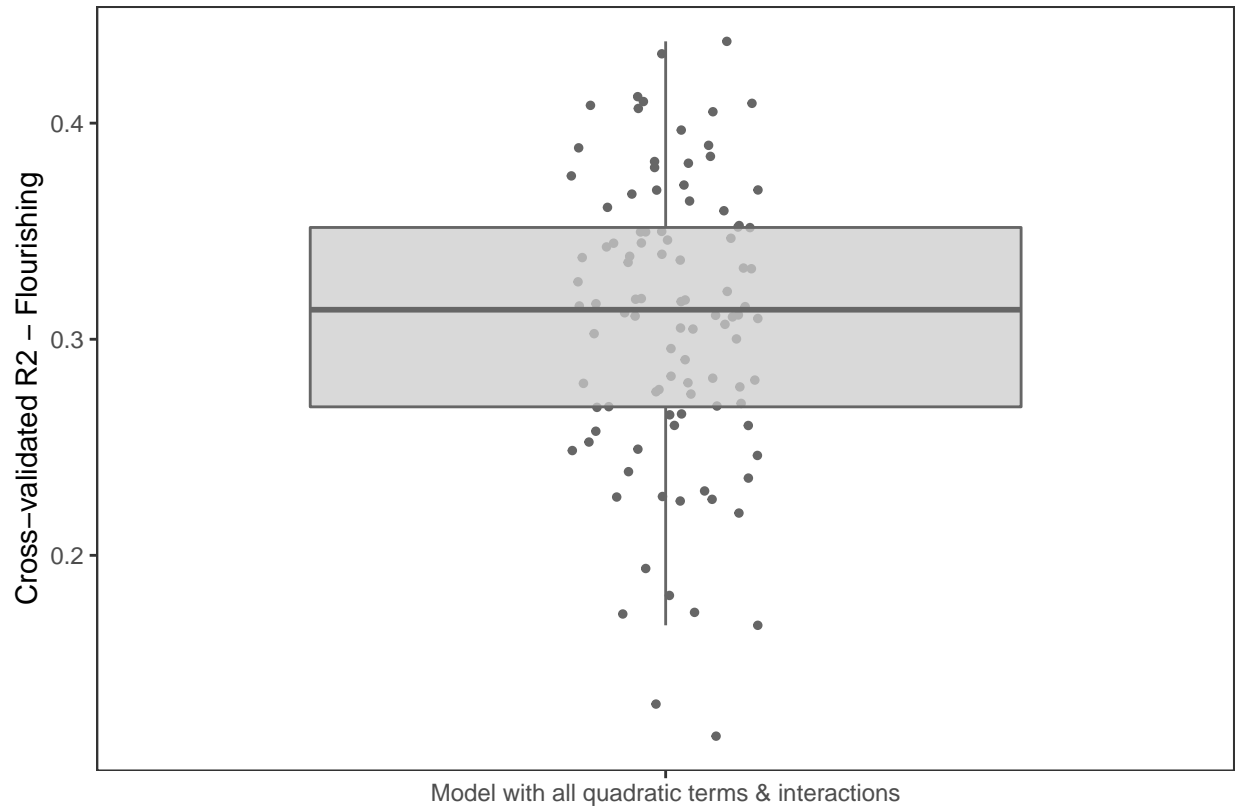

```

cesd_train_all$resample %>%
  ggplot(aes(x = 'Model with all quadratic terms & interactions', y = Rsquared)) +
  geom_jitter(height = 0, width = 0.1, size = 1, col = 'grey40') +
  geom_boxplot(alpha = 0.75, fill = 'grey80', col = 'grey40', outlier.color = NA) +
  scale_x_discrete(guide = guide_axis(n.dodge = 2)) +
  labs(x = '', y = 'Cross-validated R2 - Depressive symptoms')

```

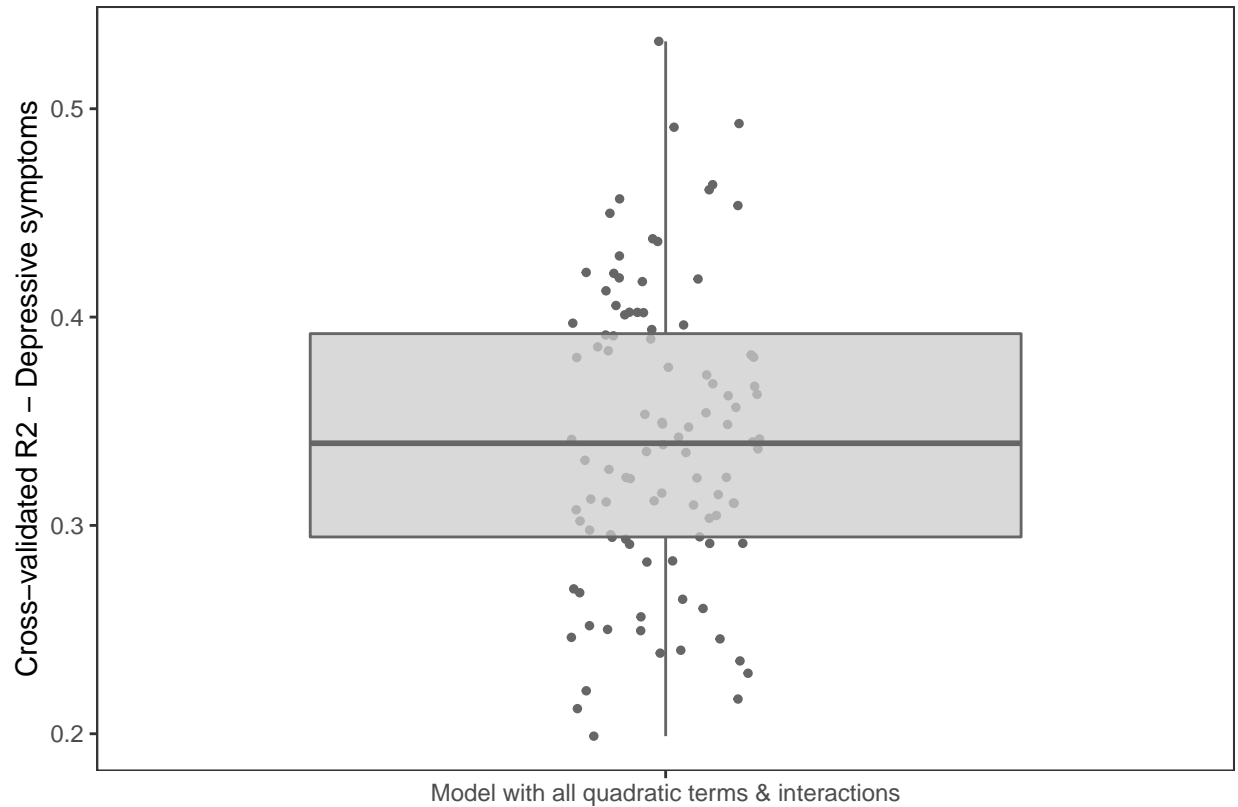

```
flourishing_train_all$resample %>%
  summarize(RMSE_mean = mean(RMSE),
            RMSE_sd = sd(RMSE),
            R2_mean = mean(Rsquared),
            R2_sd = sd(Rsquared)) %>%
  select(`Mean RMSE` = RMSE_mean,
         `RMSE std. dev` = RMSE_sd, `Mean R2` = R2_mean,
         `R2 std. dev` = R2_sd) %>%
  knitr::kable(caption = 'Cross-validated performance of the model with all quadratic terms & interactions')
```

Table 3: Cross-validated performance of the model with all quadratic terms & interactions, predicting Flourishing

| Mean RMSE | RMSE std. dev | Mean R2   | R2 std. dev |
|-----------|---------------|-----------|-------------|
| 1.009659  | 0.081944      | 0.3084138 | 0.0660169   |

```
cesd_train_all$resample %>%
  summarize(RMSE_mean = mean(RMSE),
            RMSE_sd = sd(RMSE),
            R2_mean = mean(Rsquared),
            R2_sd = sd(Rsquared)) %>%
  select(`Mean RMSE` = RMSE_mean,
         `RMSE std. dev` = RMSE_sd, `Mean R2` = R2_mean,
```

```
`R2 std. dev` = R2_sd) %>%
knitr::kable(caption = 'Cross-validated performance of the model with all quadratic terms & interactions')
```

Table 4: Cross-validated performance of the model with all quadratic terms & interactions, predicting Depressive symptoms

| Mean RMSE | RMSE std. dev | Mean R2   | R2 std. dev |
|-----------|---------------|-----------|-------------|
| 10.60009  | 0.6197262     | 0.3420665 | 0.0698725   |

```
marginal_predictions <- function(fit = NULL, vars = c(NULL), n = 1000) {

  data <- fit$model

  if (length(vars) == 2) {

    var1_min <- data %>% pluck(vars[1]) %>% min()
    var1_max <- data %>% pluck(vars[1]) %>% max()
    var1_range <- seq(var1_min, var1_max, length.out = n)
    var2_quants <- data %>% pluck(vars[2]) %>% quantile(., c(0.025, 0.5, 0.975))

    grid <- expand.grid(var1_range, var2_quants) %>% as_tibble()

    empty_tibble <- data %>%
      mutate_if(is.numeric, ~ 0) %>%
      mutate_if(is.factor, ~ levels(.x)[1]) %>%
      slice(1:n) %>%
      select(- vars)

    empty_tibble <- bind_rows(list(empty_tibble, empty_tibble, empty_tibble))

    marginal_tibble <- grid %>%
      bind_cols(empty_tibble)

  } else {

    var_min <- data %>% pluck(vars) %>% min()
    var_max <- data %>% pluck(vars) %>% max()
    var_range <- seq(var_min, var_max, length.out = n)

    marginal_tibble <- data %>%
      mutate_if(is.numeric, ~ 0) %>%
      mutate_if(is.factor, ~ levels(.x)[1]) %>%
      slice(1:n) %>%
      mutate(!!vars := var_range)

  }

  preds <- predict(fit, newdata = marginal_tibble, interval = 'confidence')

  if (length(vars) == 2) {
```

```

as_tibble(preds) %>%
  mutate(predictor1 := !!vars[1],
         predictor1_value := var1_range,
         predictor2 := !!vars[2],
         predictor2_value := var2_range) %>%
  select(predictor1, predictor1_value,
         predictor2, predictor2_value,
         predicted = fit, lwr, upr)

} else {

as_tibble(preds) %>%
  mutate(predictor := !!vars[1],
         predictor_value := var_range)%>%
  select(predictor, predictor_value, predicted = fit, lwr, upr)

}}

fit1_flourishing <- lm(flourishing_c ~ . - cesd_c + I(sleep_quantity_c ^ 2) + I(raw_fv_c ^ 2),
                    data = data_shay_pre2)
fit2_cesd <- lm(cesd_c ~ . - flourishing_c + I(sleep_quantity_c ^ 2) + I(raw_fv_c ^ 2),
               data = data_shay_pre2)

predictor <- c('sleep_quantity_c', 'sleep_quality_c',
               'activity_c', 'raw_fv_c')

label <- c('Sleep quantity', 'Sleep quality',
           'Physical activity', 'Raw fruit and vegetables')

label_levs <- label

predlabel <- tibble(predictor, label)

flourishing_offset <- mean(data_shay$FLOURISHING_MEAN, na.rm = TRUE)
cesd_offset <- mean(data_shay$CESD_SUM, na.rm = TRUE)
sleepqual_offset <- mean(data_shay$SLEEPQUAL, na.rm = TRUE)
sleepquant_offset <- mean(data_shay$SLEEP, na.rm = TRUE)
activity_offset <- mean(data_shay$ACTIVITY, na.rm = TRUE)
rawfv_offset <- mean(data_shay$RAWFV_DAILY, na.rm = TRUE)

flourishing_plot_data <- map(predictor,
                             ~ marginal_predictions(fit1_flourishing,
                                                     var = .x)) %>%

bind_rows() %>%
left_join(predlabel) %>%
mutate(label = factor(label, levels = label_levs),
       predicted = predicted + flourishing_offset,
       upr = upr + flourishing_offset,
       lwr = lwr + flourishing_offset,
       predictor_value = case_when(
         predictor == 'sleep_quantity_c' ~ predictor_value + sleepquant_offset,
         predictor == 'sleep_quality_c' ~ predictor_value + sleepqual_offset,
         predictor == 'activity_c' ~ predictor_value + activity_offset,

```

```

    predictor == 'raw_fv_c' ~ predictor_value + rawfv_offset
  ))

cesd_plot_data <- map(predictor,
  ~ marginal_predictions(fit2_cesd,
    var = .x)) %>%

bind_rows() %>%
left_join(predlabel) %>%
mutate(label = factor(label, levels = label_levs),
  predicted = predicted + cesd_offset,
  upr = upr + cesd_offset,
  lwr = lwr + cesd_offset,
  predictor_value = case_when(
    predictor == 'sleep_quantity_c' ~ predictor_value + sleepquant_offset,
    predictor == 'sleep_quality_c' ~ predictor_value + sleepqual_offset,
    predictor == 'activity_c' ~ predictor_value + activity_offset,
    predictor == 'raw_fv_c' ~ predictor_value + rawfv_offset
  ))

cesd_plot_data %>%
  group_by(predictor) %>%
  filter(predicted == max(predicted) | predicted == min(predicted))

```

```

## # A tibble: 8 x 6
## # Groups:   predictor [4]
##   predictor      predictor_value predicted   lwr   upr label
##   <chr>          <dbl>      <dbl> <dbl> <dbl> <fct>
## 1 sleep_quantity_c      9.74      13.5  11.0  16.0 Sleep quantity
## 2 sleep_quantity_c     20.0      33.0  15.7  50.2 Sleep quantity
## 3 sleep_quality_c      0.00252   20.9  18.3  23.4 Sleep quality
## 4 sleep_quality_c      4.00       5.73  2.98  8.48 Sleep quality
## 5 activity_c          -0.0100   16.2  13.6  18.8 Physical activity
## 6 activity_c           6.99     12.6  10.1  15.1 Physical activity
## 7 raw_fv_c            5.47     13.8  11.0  16.5 Raw fruit and vegetabl~
## 8 raw_fv_c           14.0     19.5   7.57  31.4 Raw fruit and vegetabl~

```

```

flourishing_plot_data %>%
  group_by(predictor) %>%
  filter(predicted == max(predicted) | predicted == min(predicted))

```

```

## # A tibble: 8 x 6
## # Groups:   predictor [4]
##   predictor      predictor_value predicted   lwr   upr label
##   <chr>          <dbl>      <dbl> <dbl> <dbl> <fct>
## 1 sleep_quantity_c      8.00       5.21  4.99  5.42 Sleep quantity
## 2 sleep_quantity_c     20.0       3.62  1.98  5.25 Sleep quantity
## 3 sleep_quality_c      0.00252    4.64  4.40  4.88 Sleep quality
## 4 sleep_quality_c      4.00       6.02  5.76  6.28 Sleep quality
## 5 activity_c          -0.0100    4.93  4.69  5.18 Physical activity
## 6 activity_c           6.99     5.57  5.33  5.81 Physical activity
## 7 raw_fv_c            4.76     5.30  5.06  5.55 Raw fruit and vegetabl~
## 8 raw_fv_c           14.0     4.14  3.02  5.27 Raw fruit and vegetabl~

```

```

flourishing_plot_data <- flourishing_plot_data %>%
  filter(predictor != 'sleep_quantity_c' | predictor_value < 6 + sleepquant_offset) %>%
  filter(predictor != 'raw_fv_c' | predictor_value < 9 + rawfv_offset)

cesd_plot_data <- cesd_plot_data %>%
  filter(predictor != 'sleep_quantity_c' | predictor_value < 6 + sleepquant_offset) %>%
  filter(predictor != 'raw_fv_c' | predictor_value < 9 + rawfv_offset)

flourishing_max_y <- max(flourishing_plot_data$upr)
flourishing_min_y <- min(flourishing_plot_data$lwr)
cesd_max_y <- max(cesd_plot_data$upr)
cesd_min_y <- min(cesd_plot_data$lwr)

breaks_fun <- function(x) {
  if (max(x) > 10) {
    seq(0, 16, 2)
  } else {
    seq(0, 10, 1)
  }
}

flourishing_plot <- ggplot(flourishing_plot_data, aes(x = predictor_value, y = predicted,
  ymin = lwr, ymax = upr)) +
  geom_ribbon(fill = 'grey90') +
  geom_line() +
  facet_wrap(~ label, ncol = 1, scales = 'free') +
  scale_x_continuous(breaks = breaks_fun) +
  scale_y_continuous(breaks = seq(3, 7, by = 0.5), limits = c(flourishing_min_y, flourishing_max_y)) +
  labs(x = NULL, y = 'Predicted Flourshing') +
  theme_bw() +
  theme(panel.grid.major = element_blank(),
    panel.grid.minor = element_blank())

cesd_plot <- ggplot(cesd_plot_data, aes(x = predictor_value, y = predicted,
  ymin = lwr, ymax = upr)) +
  geom_ribbon(fill = 'grey90') +
  geom_line() +
  facet_wrap(~ label, ncol = 1, scales = 'free') +
  scale_x_continuous(breaks = breaks_fun) +
  ylim(cesd_min_y, cesd_max_y) +
  labs(x = NULL, y = 'Predicted Depressive Symptoms') +
  theme_bw() +
  theme(panel.grid.major = element_blank(),
    panel.grid.minor = element_blank())

plot_grid(cesd_plot, flourishing_plot)

```

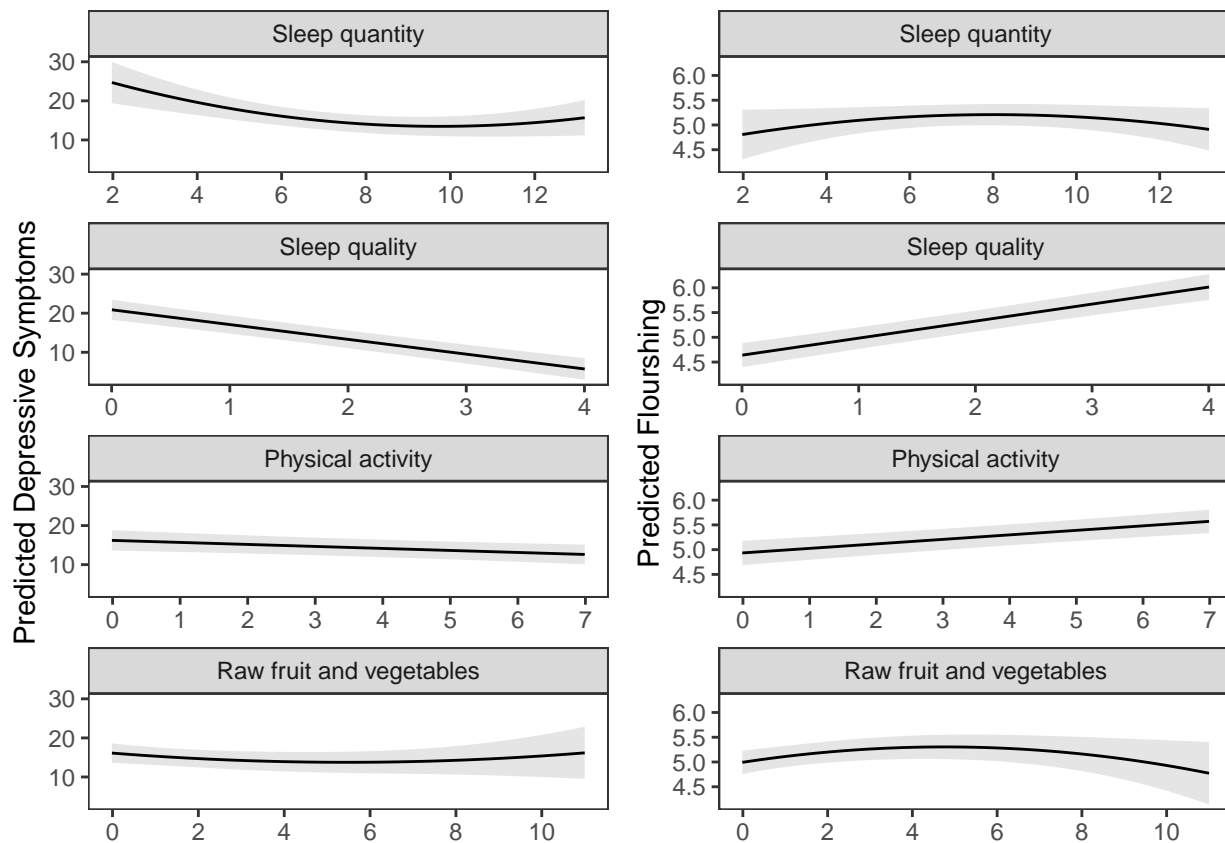

```
ggsave('figure_lifestyle.png', width = 180, height = 280, units = 'mm')
```

```
fit1_flourishing %>%
  tidy() %>%
  knitr::kable(caption = 'Model predicting flourishing')
```

Table 5: Model predicting flourishing

| term                          | estimate   | std.error | statistic  | p.value   |
|-------------------------------|------------|-----------|------------|-----------|
| (Intercept)                   | 0.1962744  | 0.1084224 | 1.8102748  | 0.0705305 |
| age_c                         | 0.0377934  | 0.0187875 | 2.0116230  | 0.0445073 |
| genderFemale                  | 0.1899284  | 0.0712753 | 2.6647142  | 0.0078200 |
| genderGender Diverse          | 0.2567945  | 0.2424706 | 1.0590747  | 0.2898021 |
| ethnicity_catAsian            | -0.3037168 | 0.1164165 | -2.6088802 | 0.0092092 |
| ethnicity_catBlack            | 0.2276921  | 0.1374320 | 1.6567616  | 0.0978576 |
| ethnicity_catHispanic         | -0.2748113 | 0.1550834 | -1.7720229 | 0.0766721 |
| ethnicity_catOther            | -0.0237953 | 0.0818443 | -0.2907387 | 0.7713069 |
| sample1                       | -0.2556121 | 0.1050430 | -2.4334043 | 0.0151187 |
| unemployedUnemployed          | -0.2922670 | 0.1060942 | -2.7547876 | 0.0059715 |
| ses_c                         | 0.2438261  | 0.0255655 | 9.5373175  | 0.0000000 |
| bmi_c                         | -0.0008041 | 0.0052027 | -0.1545510 | 0.8772041 |
| conditionHas health condition | -0.1003219 | 0.0700860 | -1.4314115 | 0.1526011 |
| allergyHas Food Allergy       | 0.0643986  | 0.0835385 | 0.7708849  | 0.4409435 |
| vegetarianEats no meats       | -0.0047516 | 0.1214557 | -0.0391224 | 0.9688000 |



| term                  | estimate   | std.error | statistic  | p.value   |
|-----------------------|------------|-----------|------------|-----------|
| alcohol_daily_c       | 0.0079248  | 0.0269539 | 0.2940137  | 0.7688038 |
| medmoodYES            | -0.1979565 | 0.0787034 | -2.5152221 | 0.0120397 |
| vitsup                | 0.0115840  | 0.0377931 | 0.3065103  | 0.7592751 |
| regsmokel             | 0.1661125  | 0.1110521 | 1.4958071  | 0.1349955 |
| sleep_quantity_c      | 0.0180673  | 0.0246726 | 0.7322811  | 0.4641556 |
| sleep_quality_c       | 0.3437674  | 0.0337698 | 10.1797209 | 0.0000000 |
| raw_fv_c              | 0.0751033  | 0.0266808 | 2.8148844  | 0.0049680 |
| activity_c            | 0.0910143  | 0.0170438 | 5.3400149  | 0.0000001 |
| cooked_fv_c           | -0.0602906 | 0.0312355 | -1.9301961 | 0.0538437 |
| fastfood_daily_c      | -0.1508405 | 0.0864326 | -1.7451802 | 0.0812374 |
| sweets_daily_c        | -0.0041390 | 0.0339709 | -0.1218406 | 0.9030479 |
| soda_daily_c          | -0.0304593 | 0.0319103 | -0.9545298 | 0.3400287 |
| I(sleep_quantity_c^2) | -0.0111000 | 0.0054978 | -2.0190014 | 0.0437333 |
| I(raw_fv_c^2)         | -0.0136575 | 0.0051440 | -2.6550302 | 0.0080466 |

```
fit2_cesd %>%
  tidy() %>%
  knitr::kable(caption = 'Model predicting Depressive Symptoms')
```

Table 6: Model predicting Depressive Symptoms

| term                          | estimate   | std.error | statistic   | p.value   |
|-------------------------------|------------|-----------|-------------|-----------|
| (Intercept)                   | -4.6904110 | 1.1467750 | -4.0900885  | 0.0000463 |
| age_c                         | -0.6338210 | 0.1987142 | -3.1896115  | 0.0014656 |
| genderFemale                  | 1.1244499  | 0.7538732 | 1.4915636   | 0.1361051 |
| genderGender Diverse          | 3.8410714  | 2.5645919 | 1.4977320   | 0.1344945 |
| ethnicity_catAsian            | 1.7423461  | 1.2313281 | 1.4150137   | 0.1573522 |
| ethnicity_catBlack            | 0.5374954  | 1.4536071 | 0.3697667   | 0.7116287 |
| ethnicity_catHispanic         | 3.6755124  | 1.6403039 | 2.2407508   | 0.0252445 |
| ethnicity_catOther            | 0.7433974  | 0.8656603 | 0.8587634   | 0.3906612 |
| sample1                       | 0.7260835  | 1.1110310 | 0.6535223   | 0.5135585 |
| unemployedUnemployed          | 1.5293597  | 1.1221495 | 1.3628841   | 0.1732026 |
| ses_c                         | -2.2464002 | 0.2704039 | -8.3075718  | 0.0000000 |
| bmi_c                         | 0.0797207  | 0.0550287 | 1.4487113   | 0.1477080 |
| conditionHas health condition | 3.9571494  | 0.7412938 | 5.3381662   | 0.0000001 |
| allergyHas Food Allergy       | 0.9728219  | 0.8835797 | 1.1010007   | 0.2711412 |
| vegetarianEats no meats       | 0.5650534  | 1.2846267 | 0.4398581   | 0.6601277 |
| alcohol_daily_c               | 0.0091703  | 0.2850890 | 0.0321664   | 0.9743453 |
| medmoodYES                    | 3.6028094  | 0.8324394 | 4.3280140   | 0.0000164 |
| vitsup                        | 0.0373313  | 0.3997349 | 0.0933902   | 0.9256109 |
| regsmokel                     | 0.5422125  | 1.1745890 | 0.4616189   | 0.6444474 |
| sleep_quantity_c              | -0.9505182 | 0.2609601 | -3.6423892  | 0.0002829 |
| sleep_quality_c               | -3.7852337 | 0.3571807 | -10.5975329 | 0.0000000 |
| raw_fv_c                      | -0.5430293 | 0.2822003 | -1.9242689  | 0.0545829 |
| activity_c                    | -0.5136432 | 0.1802712 | -2.8492799  | 0.0044649 |
| cooked_fv_c                   | 0.6292102  | 0.3303753 | 1.9045319   | 0.0571059 |
| fastfood_daily_c              | 0.5463396  | 0.9141904 | 0.5976212   | 0.5502177 |
| sweets_daily_c                | 0.6623351  | 0.3593070 | 1.8433684   | 0.0655486 |
| soda_daily_c                  | 0.1376289  | 0.3375124 | 0.4077744   | 0.6835199 |
| I(sleep_quantity_c^2)         | 0.1859461  | 0.0581495 | 3.1977223   | 0.0014253 |
| I(raw_fv_c^2)                 | 0.0787783  | 0.0544076 | 1.4479286   | 0.1479267 |
